# THE AMERICAN JOURNAL OF PSYCHIATRY

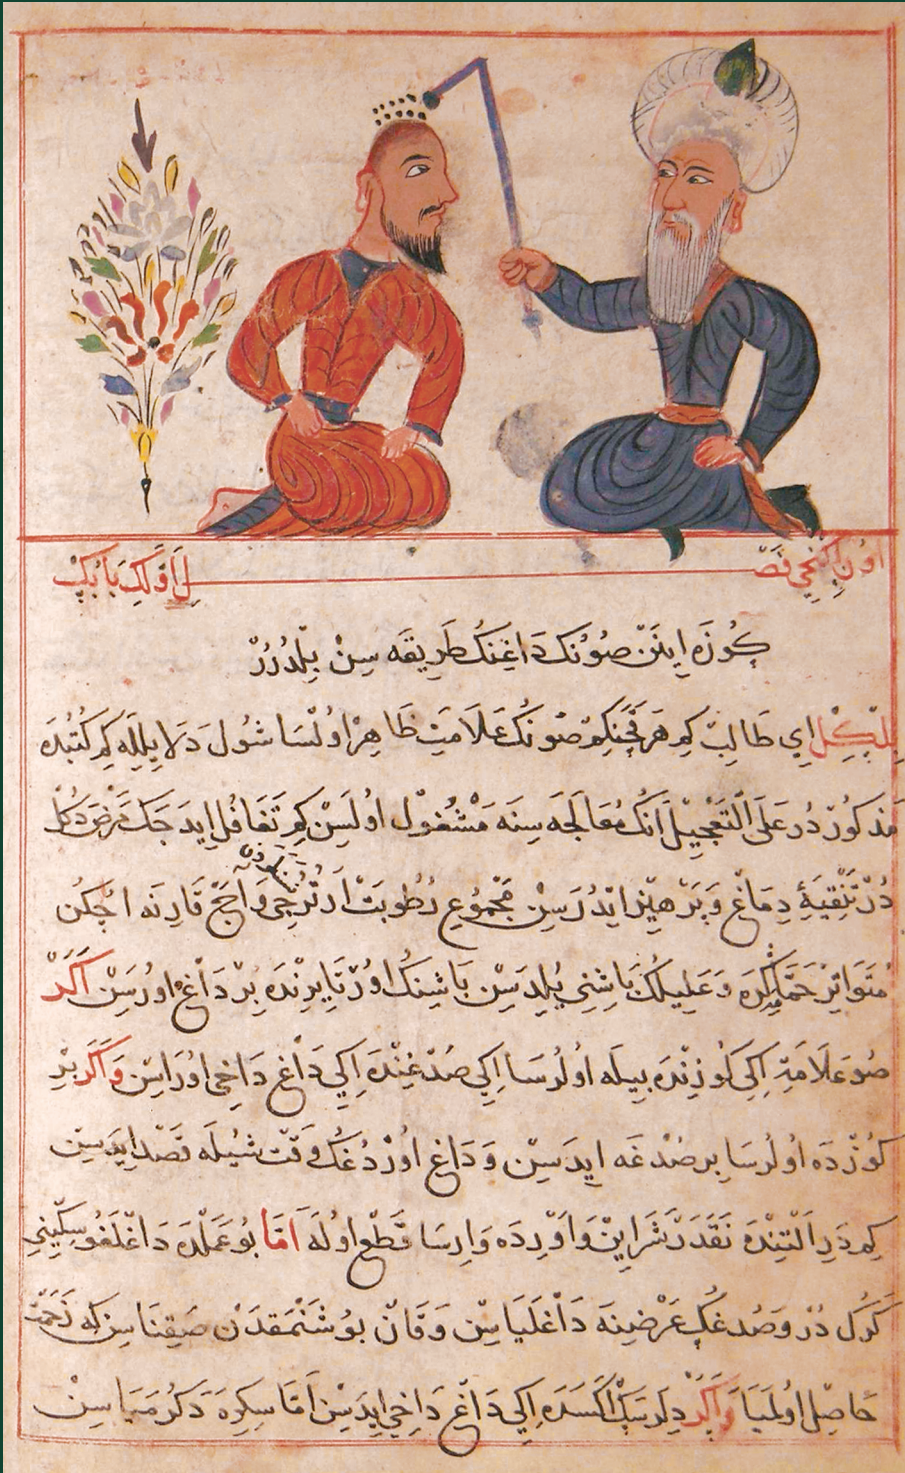

Attention Deficit Hyperactivity Disorder  
and Substance Use Disorders  
Timothy E. Wilens 2059

A Randomized, Double-Blind, Placebo-  
Controlled Trial of Metformin  
Treatment of Weight Gain Associated  
With Initiation of Atypical Antipsychotic  
Therapy in Children and Adolescents  
David J. Klein et al. 2072

Cost-Effectiveness of Second Generation  
Antipsychotics and Perphenazine in a  
Randomized Trial of Treatment for  
Chronic Schizophrenia  
Robert A. Rosenheck et al. 2080

Effectiveness of Switching Antipsychotic  
Medications  
Susan M. Essock et al. 2090

Continuing Medical Education 2206

December 2006

Volume 163 • Number 12

Official Journal of the  
AMERICAN PSYCHIATRIC ASSOCIATION

[ajp.psychiatryonline.org](http://ajp.psychiatryonline.org)

# THE AMERICAN JOURNAL OF PSYCHIATRY

Official Journal of the American Psychiatric Association

## Instructions for Activating Your Online Subscription

All subscribers to the print edition of *The American Journal of Psychiatry* are automatically eligible to view the *Journal* online. The online version of the *Journal* allows you to conduct searches for topics of interest in issues going all the way back to 1844. Plus the only way readers can participate in the *Journal's* new CME Course program is to have an activated online subscription (note: there is an additional annual fee to be enrolled and eligible to receive up to 36 hours of category 1 CME credit).

To activate your online subscription:

Make sure you have your customer identification number available. This number is printed on your *Journal* mailing label, directly above your name and address. If you cannot locate this number, please contact American Psychiatric Publishing, Inc., through one of the following methods:

- e-mail: [accessnumber@psych.org](mailto:accessnumber@psych.org)
- phone: (800) 368-5777
- fax: (703) 907-1091
- mail:

American Psychiatric Publishing, Inc.  
1000 Wilson Blvd., Suite 1825  
Arlington, VA 22209-3901  
Attn: Circulation Department.

Internet: <http://www.psychiatryonline.org>. Click on the "Subscriptions" button located near the bottom of the page. Then click on the appropriate link:

- ACTIVATE Your Member or Individual (Nonmember) Subscription

For APA Members, you will find your member number on the mailing label above your name. It is

a 10-digit number beginning with zeros. Enter your number in the box and click the SUBMIT button.

For Individual Nonmembers and Institutions, your customer number is on the mailing label above your name. It is a 10-digit number beginning with 22 or 30. Enter this number in the box and click the SUBMIT button.

Fill out all the information on the next screen and press the "Send Form" button at the bottom on the right.

When finished, click the "Done" button. You will receive an e-mail confirmation that your subscription has been activated.

**Continuing Medical Education:** You now have an opportunity to earn CME credits by reading articles in *The American Journal of Psychiatry*. Three articles in each issue will each comprise a short course for up to 1 hour category 1 CME credit each. The course comprises reading the article and answering three multiple-choice questions with a single correct answer. CME Credit is issued only online. Readers who want credit must subscribe to the AJP Continuing Medical Education Course program (APA Members: \$97.00 per year; Nonmember subscribers: \$144.00 per year; nonmember nonsubscribers: \$180.00 per year). Go to [cme.psychiatryonline.org](http://cme.psychiatryonline.org), select *The American Journal of Psychiatry* at that site, take the course(s) of your choosing, complete the evaluation form, and submit your answers for CME credit. In the online course, correct answers will be highlighted for your reference; there is no minimum threshold score necessary for the credit. A link from the question to the correct answer in context will be highlighted in the associated article. A certificate for each course will be generated upon successful completion.

The American Journal of Psychiatry is online at [ajp.psychiatryonline.org](http://ajp.psychiatryonline.org)



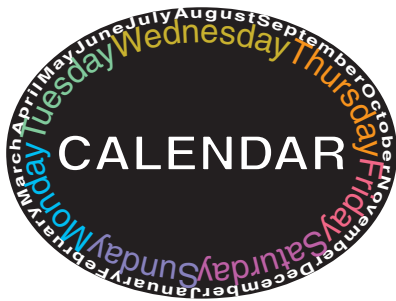

For free listing of your organization's official annual or regional meeting, please send us the following information: sponsor, location, inclusive dates, type and number of continuing education credits (if available), and the name, address, and telephone number of the person or group to contact for more information. In order for an event to appear in our listing, all notices and changes must be received at least 6 months in advance of the meeting and should be addressed to:

Calendar, American Journal of Psychiatry, 1000 Wilson Boulevard, Suite 1825, Arlington, VA 22209-3901, (703) 907-8572 (tel), [jblair@psych.org](mailto:jblair@psych.org) (e-mail).

Because of space limitations, only listings of meetings of the greatest interest to Journal readers will be included.

## JANUARY 2007

**January 13**, 6th Annual Women's Mental Health Symposium, Tucson, AZ. Contact: Professional Development Office, University of Arizona College of Medicine, Department of Psychiatry, PO Box 245002, 1501 N Campbell, #7423, Tucson, AZ 85724-5002; (520) 626-1392 (tel), (520) 626-5732 (fax), [uapsycon@email.arizona.edu](mailto:uapsycon@email.arizona.edu) (e-mail), [www.psychiatry.arizona.edu](http://www.psychiatry.arizona.edu) (web site).

**January 20**, The Tri-State Chapter of The American Academy of Psychiatry and the Law 32nd Annual Conference: Civil Forensic Practice: Sex, Work, Trauma and Safety, New York, NY. Contact: Andrew Kleiman and Charles Luther, 420 Madison Ave. #504, New York, NY 10017; (212) 562-6996 (tel), [charles.luther@med.nyu.edu](mailto:charles.luther@med.nyu.edu) (e-mail).

## FEBRUARY

**February 17–20**, 18th Annual Meeting of American Neuropsychiatric Association, Tucson, AZ. Contact: American Neuropsychiatric Association, 700 Ackerman Road, Suite 625, Columbus, Ohio 43202; (614) 447-2077 (tel), [anpa@osu.edu](mailto:anpa@osu.edu) (e-mail), [www.anpaonline.org](http://www.anpaonline.org) (web-site).

**February 19–23**, 16th Annual Psychopharmacology Review, Tucson, AZ. Contact: Professional Development Office, University of Arizona College of Medicine, Department of Psychiatry, PO Box 245002, 1501 N Campbell, #7423, Tucson, AZ 85724-5002; (520) 626-1392 (tel), (520) 626-5732 (fax), [uapsycon@email.arizona.edu](mailto:uapsycon@email.arizona.edu) (e-mail), [www.psychiatry.arizona.edu](http://www.psychiatry.arizona.edu) (web site).

**February 21–25**, Annual meeting of the American College of Psychiatrists, Palm Springs, California. Contact: American College of Psychiatrists, 732 Addison St., Ste. B, Berkeley, CA 94710; (510) 704-8020 (tel), (510) 704-0113 (fax), [Barbara@acpsych.org](mailto:Barbara@acpsych.org) (e-mail).

**February 22-23**, The British Neuropsychiatry Association 20th Anniversary Annual Meeting: Neuropsychiatry and Neuroscience, Epilepsy and Parkinson's Disease, London. Contact: Jackie Ashmenall, St Aidan, Ealing Green, Ealing, London W5 5EN; [jashmenall@yahoo.com](mailto:jashmenall@yahoo.com) (e-mail).

## MARCH

**March 1–4**, 20th Annual Meeting of the American Association for Geriatric Psychiatry, New Orleans. Contact: AAGP, 7910 Woodmont Ave., Ste. 1050, Bethesda, MD 20814-3004; (301) 654-7850 (tel), (301) 654-4137 (fax), [www.aagpmeeting.org](http://www.aagpmeeting.org) (web site).

**March 17–21**, 15th European Congress of Psychiatry, Madrid. Contact: Kenes International – Global Congress Organisers and Association Management Services, 17 Rue du Cendrier, PO Box 1726, CH-1211 Geneva 1, Switzerland; (41) 22 908 0488 (tel), (41) 22 732 2850 (fax), [aep2007@kenes.com](mailto:aep2007@kenes.com) (e-mail), [www.kenes.com/aep2007](http://www.kenes.com/aep2007) (web site).

**March 30-Apr 1**, 33rd Annual American Academy of Clinical Psychiatrists Conference, Washington, DC. Contact: American Academy of Clinical Psychiatrists, P.O. Box 458, Glastonbury, CT 06033-0458; (860) 833-5045 (tel), (860) 833-6023 (fax), [aacp@cox.net](mailto:aacp@cox.net) (e-mail), [www.aacp.com](http://www.aacp.com) (web-site).

## APRIL

**April 18–21**, 28th Annual Meeting and Scientific Sessions of the Society of Behavioral Medicine, Miami Beach. Contact: Society of Behavioral Medicine, 17000 Commerce Parkway, Ste. C, Mount Laurel, NJ 08054; (856) 439-1297 (tel), (856) 439-0525 (fax), [info@sbm.org](mailto:info@sbm.org) (e-mail).

**April 26–29**, 25th Annual Symposium of the American College of Forensic Psychiatry, Santa Fe, NM. Contact: American College of Forensic Psychiatry, P.O. Box 5870, Balboa Is-

land, CA 92662; (949) 673-7773 (tel), (949) 673-7710 (fax), [psychlaw@sover.net](mailto:psychlaw@sover.net) (e-mail), [www.forensicspsychonline.com](http://www.forensicspsychonline.com) (web site).

## MAY

**May 17–20**, The 51st Annual Meeting of the American Academy of Psychoanalysis and Dynamic Psychiatry, San Diego. Contact: Executive Office, American Academy of Psychoanalysis and Dynamic Psychiatry, P. O. Box 30, Bloomfield, CT 06002; (888) 691-8281 (tel), (888) 286-0787 (fax), [aap@ssmgt.com](mailto:aap@ssmgt.com) (e-mail), [www.aapdp.org](http://www.aapdp.org) (web site).

**May 19–24**, 160th Annual Meeting of the American Psychiatric Association, San Diego. Contact: Cathy Nash, APA Annual Meetings Dept., 1000 Wilson Blvd., Ste. 1825, Arlington, VA 22209; (703) 907-7822.

## OCTOBER

**October 7–11**, 15th World Congress on Psychiatric Genetics, New York. Contact: Lynn E DeLisi, International Society of Psychiatric Genetics, NYU School of Medicine, 650 First Avenue, 5th Floor Room 543, New York, NY 10016; (212) 263-3420 (tel), (212) 263-3407 (fax).

**October 11-14**, 59th Institute on Psychiatric Services, American Psychiatric Association, New Orleans, LA. Contact: Jill Gruber, APA Annual Meetings Dept., 1000 Wilson Blvd., Ste. 1825, Arlington, VA 22209; (703) 907-7815.

**October 12-15**, Annual Meeting of the Society for the Study of Psychiatry and Culture (SSPC), Hyatt Regency Capitol Hill, Washington, DC. Contact: Jim Boehnlein or Shannon Squire, (503) 220-3481, [shannon.squire@med.va.gov](mailto:shannon.squire@med.va.gov) (e-mail).

**October 23–28**, 54th Annual Meeting of the American Academy of Child and Ado-

Continued on page A52

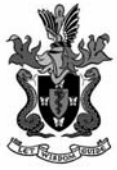

# THE BRITISH JOURNAL OF PSYCHIATRY

November 2006, VOL. 189

<http://bjp.rcpsych.org>

A16 Editorial Board

A17 Highlights of this issue

A18 Psychiatry in pictures

## EDITORIAL

- 391 **The schizophrenia drug-treatment paradox: pharmacological treatment based on best possible evidence may be hardest to practise in high-income countries**  
C.E. Adams, P. Tharyan, E.S.F. Coutinho, and T.S. Stroup

## REVIEW ARTICLE

- 393 **Suicidal behaviour in youths with depression treated with new-generation antidepressants. Meta-analysis**  
B. Dubicka, S. Hadley, and C. Roberts

## PAPERS

- 399 **Progression of mild cognitive impairment to dementia: a challenge to current thinking**  
A. Busse, M.C. Angermeyer, and S.G. Riedel-Heller
- 405 **Music therapy for in-patients with schizophrenia. Exploratory randomised controlled trial**  
N. Talwar, M.J. Crawford, A. Maratos, U. Nur, O. McDermott, and S. Procter
- 410 **Factors associated with suicidal ideation in the general population. Five-centre analysis from the ODIN study**  
P.R. Casey, G. Dunn, B.D. Kelly, G. Birkbeck, O.S. Dalgard, V. Lehtinen, S. Britta, J.L. Ayuso-Mateos, and C. Dowrick, on behalf of the ODIN Group
- 416 **Individual- and area-level predictors of self-harm repetition**  
A. Johnston, J. Cooper, R. Webb, and N. Kapur
- 422 **Changes in genetic and environmental influences on depressive symptoms across adolescence and young adulthood**  
J.Y.F. Lau and T.C. Eley
- 428 **Outcome and prognostic factors for adolescent female in-patients with anorexia nervosa: 9- to 14-year follow-up**  
A. Hjern, L. Lindberg, and F. Lindblad

- 433 **Comparative effectiveness of second-generation antipsychotics and haloperidol in acute schizophrenia**

R.E. McCue, R. Waheed, L. Urcuyo, G. Orendain, M.D. Joseph, R. Charles, and S.M. Hasan

- 441 **Crisis resolution/home treatment teams and psychiatric admission rates in England**  
G. Glover, G. Arts, and K.S. Babu

- 446 **Clinical and social determinants of duration of untreated psychosis in the ÆSOP first-episode psychosis study**  
C. Morgan, R. Abdul-Al, J.M. Lappin, P. Jones, P. Fearon, M. Leese, T. Croudace, K. Morgan, P. Dazzan, T. Craig, J. Leff, and R. Murray, on behalf of the ÆSOP Study Group

- 453 **Sustained attention and executive functions in euthymic young people with bipolar disorder**  
U.S. Kolar, Y.C.J. Reddy, J.P. John, T. Kandavel, and S. Jain

## SHORT REPORTS

- 459 **Klinefelter's syndrome (karyotype 47,XXY) and schizophrenia-spectrum pathology**  
S. van Rijn, A. Aleman, H. Swaab, and R.S. Kahn
- 461 **Modafinil and unconstrained motor activity in schizophrenia. Double-blind crossover placebo-controlled trial**  
T.F.D. Farrow, M.D. Hunter, R. Haque, and S.A. Spence
- 463 **Neuropsychological performance at the age of 13 years and adult schizophreniform disorder. Prospective birth cohort study**  
M. Cannon, T.E. Moffitt, A. Caspi, R.M. Murray, H. Harrington, and R. Poulton
- 465 **The ecological fallacy and the gender ratio of suicide in China**  
P.S.F. Yip and K.Y. Liu

## COLUMNS

- 467 **Correspondence**
- 471 **One hundred years ago**
- 473 **Book reviews**
- 476 **Contents of the *American Journal of Psychiatry***
- 477 **Contents of *Advances in Psychiatric Treatment***
- 478 **From the Editor's desk**



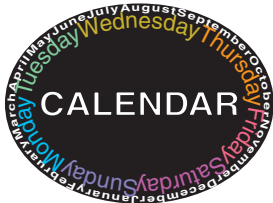

Continued from page A44

lescent Psychiatry, Boston. Contact: AACAP, 3615 Wisconsin Avenue, N.W., Washington, DC 20016-3007; (202) 966-7300 (tel), (202) 966-2891 (fax), meetings@aacap.org (e-mail), www.aacap.org (web site).

## FEBRUARY 2008

**February 15–18**, 21st Annual Meeting of the American Association for Geriatric Psychiatry, Washington, DC. Contact: AAGP, 7910 Woodmont Ave., Ste. 1050, Bethesda, MD 20814-3004; (301) 654-7850 (tel), (301) 654-4137 (fax), www.aagp-meeting.org (web site).

## MAY

**May 1–4**, The 52nd Annual Meeting of the American Academy of Psychoanalysis and Dynamic Psychiatry, Washington, DC. Contact: Executive Office, American Academy of Psychoanalysis and Dynamic Psychiatry, P. O. Box 30, Bloomfield, CT 06002; (888) 691-8281 (tel), (888) 286-0787 (fax), aap@ssmgt.com (e-mail).

## CONTENTS (Continued from page A5)

### Continuing Medical Education

2206

### In Appreciation

2209

### Annual Author Index

2215

### Other Items of Interest

A12 How to Activate Your Online Subscription

A19 Officers of the American Psychiatric Association

A44 Calendar

A49 *The British Journal of Psychiatry* contents (November 2006)

A58 *Psychological Medicine* contents (November 2006)

A75 Index to Advertisers

### Cover

The first illustrated surgery textbook was written and illustrated by Serefeddin Sabuncuoglu (1385-1470) who practiced medicine in the city of Amasya in northern Anatolia (see Images in Psychiatry, p. 2071). Sections of this work relating to psychiatry concern treatments for neurotic disorders and forgetfulness. A treatment using heat cauterization is shown. Image courtesy of Fatih Millet Library, Istanbul.

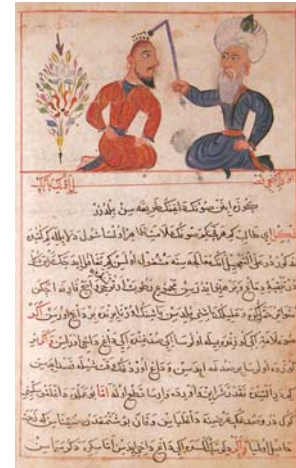

## Coming in the January 2007 issue

### THE AMERICAN JOURNAL OF PSYCHIATRY

#### *Service Costs of Caring for Adolescents With Mental Illness in a Rural Community, 1993–2000*

E.J. Costello, W. Copeland, A. Cowell, and G. Keeler

#### *Is Decreased Prefrontal Cortical Sensitivity to Monetary Reward Associated With Impaired Motivation and Self-Control in Cocaine Addiction?*

R.Z. Goldstein, N. Alia-Klein, D. Tomasi, L. Zhang, L.A. Cottone, T. Maloney, F. Telang, E.C. Caparelli, L. Chang, T. Ernst, D. Samaras, N.K. Squires, and N.D. Volkow

#### *Neural Circuitry Engaged During Unsuccessful Motor Inhibition in Pediatric Bipolar Disorder*

E. Leibenluft, B.A. Rich, D.T. Vinton, E.E. Nelson, S.J. Fromm, L.H. Berghorst, P. Joshi, A. Robb, R.J. Schachar, D.P. Dickstein, E.B. McClure, and D.S. Pine

#### *Independent Domains of Inhibitory Gating in Schizophrenia and the Effect of Stimulus Interval*

L.E. Hong, A. Summerfelt, I. Wonodi, H. Adami, R.W. Buchanan, and G.K. Thaker

# Psychological Medicine

Volume 36 Number 11 November 2006

## CONTENTS

---

|                                                                                                                                                                                                                                                                                                                               |      |                                                                                                                                                                                                                                                                           |
|-------------------------------------------------------------------------------------------------------------------------------------------------------------------------------------------------------------------------------------------------------------------------------------------------------------------------------|------|---------------------------------------------------------------------------------------------------------------------------------------------------------------------------------------------------------------------------------------------------------------------------|
| IN THIS ISSUE                                                                                                                                                                                                                                                                                                                 | 1499 | <b>Is antisocial personality disorder continuous or categorical? A taxometric analysis</b> MARCUS, D.K., LILIENFELD, S.O., EDENS, J.F., AND POYTHRESS, N.G. 1571                                                                                                          |
| <b>INVITED REVIEW</b>                                                                                                                                                                                                                                                                                                         |      | <b>Dimensional representations of DSM-IV Cluster A personality disorders in a population-based sample of Norwegian twins: a multivariate study</b> KENDLER, K.S., CZAJKOWSKI, N., TAMBS, K., TORGERSEN, S., AGGEN, S.H., NEALE, M.C., AND REICHBORN-KJENNERUD, T. 1583    |
| <b>Precursors and prodromata of schizophrenia: findings from the Edinburgh High Risk Study and their literature context</b> OWENS, D.G.C., AND JOHNSTONE, E.C. 1501                                                                                                                                                           |      | <b>The structure of common DSM-IV and ICD-10 mental disorders in the Australian general population</b> SLADE, T. AND WATSON, D. 1593                                                                                                                                      |
| <b>REVIEW ARTICLE</b>                                                                                                                                                                                                                                                                                                         |      | <b>A scale to screen for DSM-IV Axis I disorders in psychiatric out-patients: performance of the Psychiatric Diagnostic Screening Questionnaire</b> ZIMMERMAN, M. AND CHELMINSKI, I. 1601                                                                                 |
| <b>Comparing the efficacy of EMDR and trauma-focused cognitive-behavioral therapy in the treatment of PTSD: a meta-analytic study</b> SEIDLER, G.H., AND WAGNER, F.E. 1515                                                                                                                                                    |      | <b>Reaction time, inhibition, working memory and 'delay aversion' performance: genetic influences and their interpretation</b> KUNTSI, J., ROGERS, H., SWINARD, G., BÖRGER, N., VAN DER MEERE, J., RIJSDIJK, F., AND ASHERSON, P. 1613                                    |
| <b>ORIGINAL ARTICLES</b>                                                                                                                                                                                                                                                                                                      |      | <b>Worry content across the lifespan: an analysis of 16- to 74-year-old participants in the British National Survey of Psychiatric Morbidity 2000</b> LINDESAY, J., BAILLON, S., BRUGHA, T., DENNIS, M., STEWART, R., ARAYA, R., AND MELTZER, H. 1625                     |
| <b>Epidemiology of trauma, post-traumatic stress disorder (PTSD), and co-morbid disorders in Chile</b> ZLOTNICK, C., JOHNSON, J., KOHN, R., VICENTE, B., RIOSECO, P., AND SALDIVIA, S. 1523                                                                                                                                   |      | <b>Fear of falling more important than pain and depression for functional recovery after surgery for hip fracture in older people</b> OUDE VOSHAAR, R.C., BANERJEE, S., HORAN, M., BALDWIN, R., PENDLETON, N., PROCTOR, R., TARRIER, N., WOODWARD, Y., AND BURNS, A. 1635 |
| <b>Annual prevalence of diagnosed schizophrenia in the USA: a claims data analysis approach</b> WU, E. Q., SHI, L., BIRNBAUM, H., HUDSON, T., AND KESSLER, R. 1535                                                                                                                                                            |      | <b>Relationship between drug company funding and outcomes of clinical psychiatric research</b> KELLY JR., R.E., COHEN, L.J., SEMPLE, R.J., BIALER, P., LAU, A., BODENHEIMER, A., NEUSTADTER, E., BARENBOIM, A., AND GALYNKER, I.I. 1647                                   |
| <b>Incidence of schizophrenia and other psychoses in ethnic minority groups: results from the MRC AESOP Study</b> FEARON, P., KIRKBRIDE, J.B., MORGAN, C., DAZZAN, P., MORGAN, K., LLOYD, T., HUTCHINSON, G., TARRANT, J., FUNG, W.L.A., HOLLOWAY, J., MALLET, R., HARRISON, G., LEFF, J., JONES, P.B., AND MURRAY, R.M. 1541 |      | <i>American Journal of Psychiatry Contents July 2006</i> 1657                                                                                                                                                                                                             |
| <b>Remission and relapse in psychosis: operational definitions based on case-note data</b> BEBBINGTON, P.E., CRAIG, T., GARETY, P., FOWLER, D., DUNN, G., COLBERT, S., FORNELLS-AMBROJO, M., AND KUIPERS, E. 1551                                                                                                             |      |                                                                                                                                                                                                                                                                           |
| <b>Face affect recognition deficits in personality-disordered offenders: association with psychopathy</b> DOLAN, M., AND FULLAM, R. 1563                                                                                                                                                                                      |      |                                                                                                                                                                                                                                                                           |
