# THE AMERICAN JOURNAL OF PSYCHIATRY

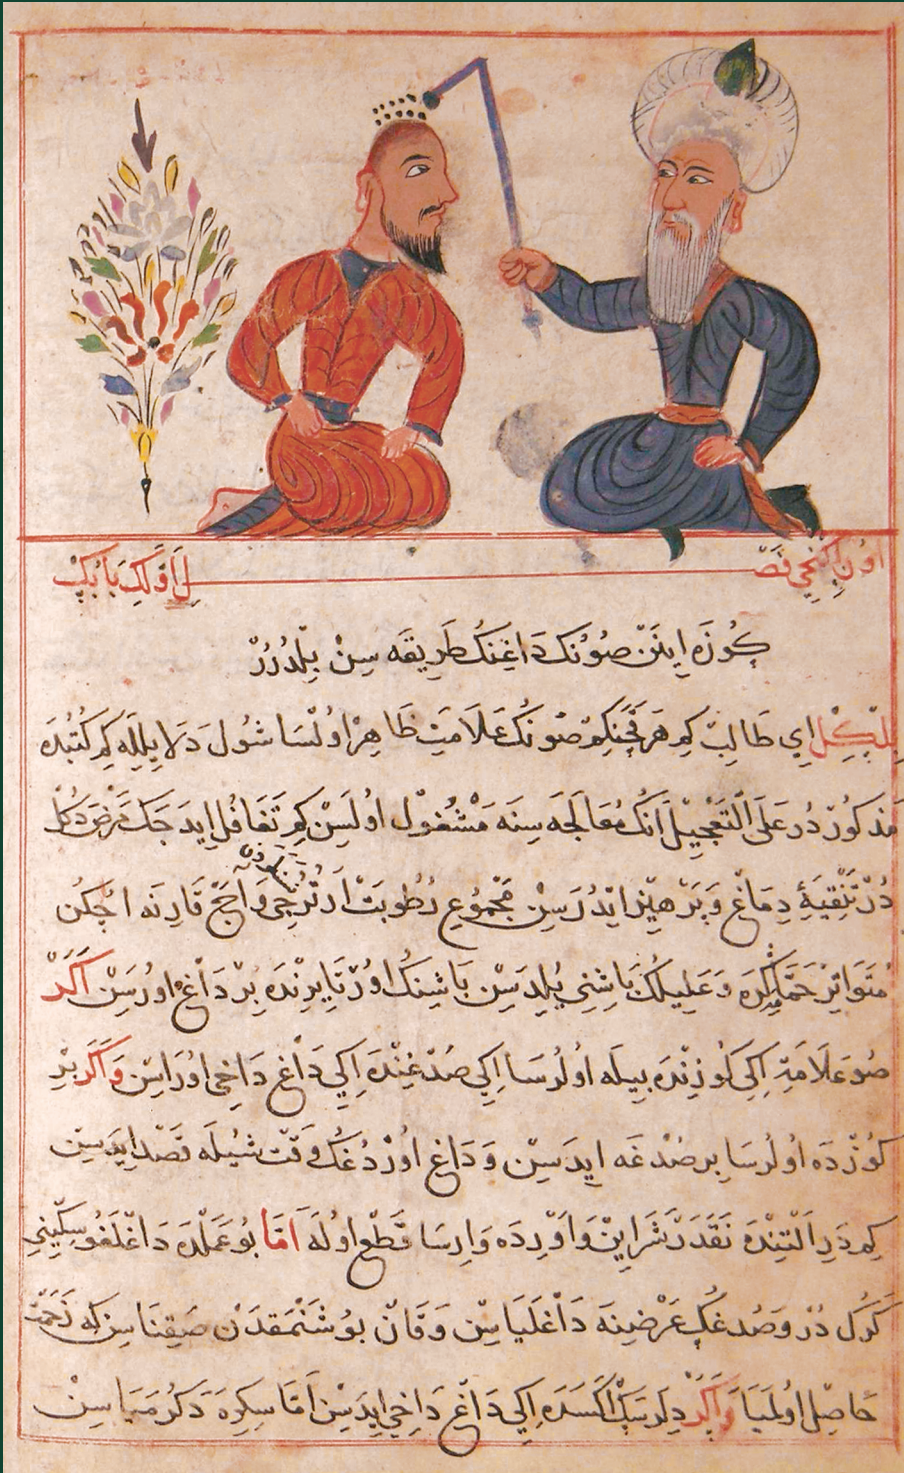

Attention Deficit Hyperactivity Disorder  
and Substance Use Disorders  
Timothy E. Wilens 2059

A Randomized, Double-Blind, Placebo-  
Controlled Trial of Metformin  
Treatment of Weight Gain Associated  
With Initiation of Atypical Antipsychotic  
Therapy in Children and Adolescents  
David J. Klein et al. 2072

Cost-Effectiveness of Second Generation  
Antipsychotics and Perphenazine in a  
Randomized Trial of Treatment for  
Chronic Schizophrenia  
Robert A. Rosenheck et al. 2080

Effectiveness of Switching Antipsychotic  
Medications  
Susan M. Essock et al. 2090

Continuing Medical Education 2206

December 2006

Volume 163 • Number 12

Official Journal of the  
AMERICAN PSYCHIATRIC ASSOCIATION

[ajp.psychiatryonline.org](http://ajp.psychiatryonline.org)
